**Equipment: Airway Equipment, Anesthesia Machines, CO2 Absorption, & Pulse Oximeters**

- A-548 Room A, 10/17/2000 9:00 AM - 11:00 AM (PS)**  
**Different Responses of Forehead and Finger Laser Doppler Flowmetry to Vasoconstrictive Stimuli** *Aymen A. Awad, M.D.; Wagib Ouda, M.D.; Mibai Podgoreanu, M.D.; Asbraf Gbobashy, M.D.; David G. Silverman, M.D., Anesthesiology, Yale University School of Medicine, New Haven, CT, United States.* This study compared the changes in finger and forehead perfusion during the cold pressor test.
- A-549 Room A, 10/17/2000 9:00 AM - 11:00 AM (PS)**  
**A Comparison of the Nellcor N-395 and Masimo SET Pulse Oximeters during Hypoxemia and Motion in Human Volunteers** *Steven J. Barker, Ph.D., M.D.; Scott E. Morgan, B.S., Anesthesiology, University of Arizona, Tucson, AZ, United States.* We compared the Nellcor N-395 and Masimo SET pulse oximeters during motion and hypoxemia in volunteers. The performance of the Masimo was superior to that of the Nellcor.
- A-550 Room A, 10/17/2000 9:00 AM - 11:00 AM (PS)**  
**Evaluation of the Connell Airway (CA) Tube: A Feasibility Study** *Elizabeth C. Bebringer, M.D.; Maria E.F. Sbir, M.D.; Anthony M. Mullin, B.M.E.; Sara L. Clack, R.A., Anesthesiology, Veterans Affairs Healthcare System, Long Beach, CA, United States.* The CA, a new airway device, was evaluated in ten patients undergoing monitored anesthesia care for surgeries requiring local or regional anesthesia.
- A-551 Room A, 10/17/2000 9:00 AM - 11:00 AM (PS)**  
**Accuracy in the Measurement of Endogenous Nitric Oxide in the Mechanically Ventilated Patient** *Robert E. Black, BS; Tillmann Hein, MD; Michael A.E. Ramsay, MD; Mario T. Cancemi, BS; Kevin Lynch, RRT, Anesthesiology, Baylor University Medical Center, Dallas, TX, United States.* Extending exhalation time when measuring NO in the intubated patient results in reproducible plateaus.
- A-552 Room A, 10/17/2000 9:00 AM - 11:00 AM (PS)**  
**The Intubating Laryngeal Mask Provides a Better Airway than the LMA for the Novice during Resuscitation** *Andrew Choyce, FRCA; Michael M.S. Avidan, FCASA; Amina T. Shariff, FRCA; Maria Del Aguila, FRCA; Tina Chan, FRCA, Anaesthesia, King's College Hospital, Denmark Hill, London, United Kingdom.* The ILM is superior to the LMA for emergency ventilation in the hands of the novice and was the preferred device.
- A-553 Room A, 10/17/2000 9:00 AM - 11:00 AM (PS)**  
**Comparison of Wire Reinforced Tubes with Warmed Standard Tubes to Facilitate Fiberoptic Intubation** *Neil Roy Connelly, MD; Robert Kyle, DO; Jan Gotta, MD; Atrbur Calimarin, MD; Larry D. Robbins, DO, Anesthesiology, Baystate Medical Center, Springfield, MA, United States.* When performing an elective FFB intubation, we recommend using a warmed standard TT.
- A-554 Room A, 10/17/2000 9:00 AM - 11:00 AM (PS)**  
**When Pulse Oximeters Fail: Motion and Low Perfusion** *James E. Cooke, M.D., Anesthesiology, Emory University, Atlanta, GA, United States.* An SpO<sub>2</sub> Simulator was used to test 7 pulse oximeters for sensitivity to simulated motion and low perfusion. Masimo and TFT oximeters tolerated motion. Nellcor, HP and others did not. The TFT oximeter functioned at a lower signal strength than the others.
- A-555 Room A, 10/17/2000 9:00 AM - 11:00 AM (PS)**  
**Increased Pulse Transit Time to the Foot Following Lumbar Epidural Anesthesia** *Elyad M. Davidson, MD; Yebuda Ginosar, BSc MBBS; Meir Nitzan, PhD, Anesthesiology, Hadassah University Hospital, Jerusalem, Israel.* Lumbar epidural anesthesia is accompanied by decreased vascular resistance. The current study demonstrated increased pulse transit time to the toe following epidural anesthesia.
- A-556 Room A, 10/17/2000 9:00 AM - 11:00 AM (PS)**  
**Pulse Oximetry Performance Can Affect Caregiver Time Utilization** *Charles G. Durbin, Jr, MD; Stephanie K. Rostow, RRT, Anesthesiology, University of Virginia, Charlottesville, VA, United States.* Poor oximetry performance may increase caregiver workload and errors. In 48 CABG patients, Masimo SET® oximetry was more reliable and required significantly less caregiver attention.
- A-557 Room A, 10/17/2000 9:00 AM - 11:00 AM (PS)**  
**A Modified Bronchus Blocker for One-Lung-Ventilation** *Joerg Ender, MD; Andreas Bury; Arno Diegeler, MD; Joerg Raumanns, MD; Andreas Petry, MD, Anesthesia and Intensive Care Medicine II, Heart-center, University Leipzig, Leipzig, Germany.* Comparison of a double-lumen-tube with a modified bronchus blocker for one-lung-ventilation regarding ventilation pressures and practical management.
- A-558 Room A, 10/17/2000 9:00 AM - 11:00 AM (PS)**  
**Evaluation of the Effectiveness of Two Methods of Training for the Insertion of the Laryngeal Mask Airway** *David Z. Ferson, M.D.; Thao P. Bui, M.D.; James F. Arens, M.D., Department of Anesthesiology, The University of Texas M. D. Anderson Cancer Center, Houston, TX, United States.* Hands-on training of the LMA insertion technique offers better skill acquisition than the video training.
- A-559 Room A, 10/17/2000 9:00 AM - 11:00 AM (PS)**  
**Near-Patient Determination of Mannitol for the Monitoring of Irrigating Fluid Absorption** *Hartmut Gebring, MD; Hendrik Graefe; Rolf Eichenauer, MD; Reiner Schafer, MD; Leif Dibbelt, MD, Department of Anesthesiology, Medical University, Luebeck, Germany*
- A-560 Room A, 10/17/2000 9:00 AM - 11:00 AM (PS)**  
**Performance Evaluation of a New Pulse Oximetry Technology during Physiological Artifacts** *Michael B. Jaffe, PhD, Novamatrix, Wallingford, CT, United States.* Testing of the Novamatrix Model 2001 with MARSPO<sub>2</sub> and Ohmeda Model 2000 with Masimo SET under simulated physiological conditions with motion (Biotek 2P) showed accuracy to within  $\pm 2\%$  saturation and  $\pm 1$  beat/min for all tested settings.
- A-561 Room A, 10/17/2000 9:00 AM - 11:00 AM (PS)**  
**Clinical Performance of the Cuffed Oropharyngeal Airway (COPA) during Orthopedic and Trauma Surgery in India** *Satish Jagadeesban, MD; Vivian Pinto, MD; Thaejus Job, MD; Kumar Belani, MD, Anesthesiology and Intensive Care, Hospital for Orthopaedics, Sports Medicine, Arthritis and Trauma, Bangalore, Karnataka, India.* In select cases the COPA is an economical and suitable ventilating device.
